# Supplementary material for: Incorporating Lymphovenous Anastomosis in Clinically Node-Positive Women Receiving Neoadjuvant Chemotherapy: A Shared Decision-Making Model and Nuanced Approached to the Axilla
Source: MDPI journal article supplement (doi:10.3390/curroncol30040306), 2023-04-03
Supplement: s1 [file s1]

## Supplementary Data

Table S1: Overview of Axillary Surgery and Final Pathology of Regional Nodes

| Patient | Axillary Surgery            | Number of SLN Harvested | Number of Positive SLN Harvested | Total Number of Lymph Nodes Harvested (SLNB + ALND) | Total Number of Positive Lymph Nodes (SLNB + ALNB) | Macroscopic | Microscopic | Isolated Tumour Cells | TMN Staging (8th Edition) |
|---------|-----------------------------|-------------------------|----------------------------------|-----------------------------------------------------|----------------------------------------------------|-------------|-------------|-----------------------|---------------------------|
| 1       | ALND + LVA                  | -                       | -                                | 18                                                  | 0                                                  | 0           | 0           | 0                     | ypT0N0                    |
| 2       | ALND + LVA                  | -                       | -                                | 15                                                  | 0                                                  | 0           | 0           | 0                     | ypT0N0                    |
| 3       | ALND + LVA                  | -                       | -                                | 28                                                  | 3                                                  | 0           | 1           | 2                     | ypT1N1mi                  |
| 4       | ALND + LVA                  | -                       | -                                | 17                                                  | 0                                                  | 0           | 0           | 0                     | ypT2N0                    |
| 5       | ALND + LVA                  | -                       | -                                | 12                                                  | 0                                                  | 0           | 0           | 0                     | ypT2N0                    |
| 6       | ALND + LVA                  | -                       | -                                | 16                                                  | 1                                                  | 1           | 0           | 0                     | ypTxN1                    |
| 7       | ALND + LVA                  | -                       | -                                | 19                                                  | 2                                                  | 0           | 0           | 2                     | ypT1N0(i+)                |
| 8       | SLNB with FS --> ALND + LVA | 3                       | 2                                | 12                                                  | 9                                                  | 9           | 0           | 0                     | ypT2N2                    |
| 9       | SLNB with FS --> ALND + LVA | 3                       | 2                                | 27                                                  | 26                                                 | 26          | 0           | 0                     | ypT3N3                    |
| 10      | SLNB with FS --> ALND+ LVA  | 4                       | 3                                | 16                                                  | 4                                                  | 4           | 0           | 0                     | ypT2N2                    |
| 11      | ALND + LVA                  | -                       | -                                | 10                                                  | 0                                                  | 0           | 0           | 0                     | ypT1N0                    |
| 12      | SLNB with FS                | 4                       | 0                                | 4                                                   | 0                                                  | 0           | 0           | 0                     | ypT0N0                    |
| 13      | SLNB with FS                | 5                       | 0                                | 5                                                   | 0                                                  | 0           | 0           | 0                     | ypT1N0                    |
| 14      | SLNB with FS                | 4                       | 3                                | 4                                                   | 3                                                  | 1           | 0           | 2                     | ypT1N1                    |
| 15      | SLNB with FS                | 4                       | 0                                | 4                                                   | 4                                                  | 0           | 0           | 0                     | ypT1N0                    |
